# Supplementary material for: Real-world evidence of treatment patterns and survival of metastatic gastric cancer patients in Germany
Source: Springer Nature journal article supplement (doi:10.1186/s12885-024-12204-x), 2024-04-13
Supplement: MOESM1 [file 26976158]

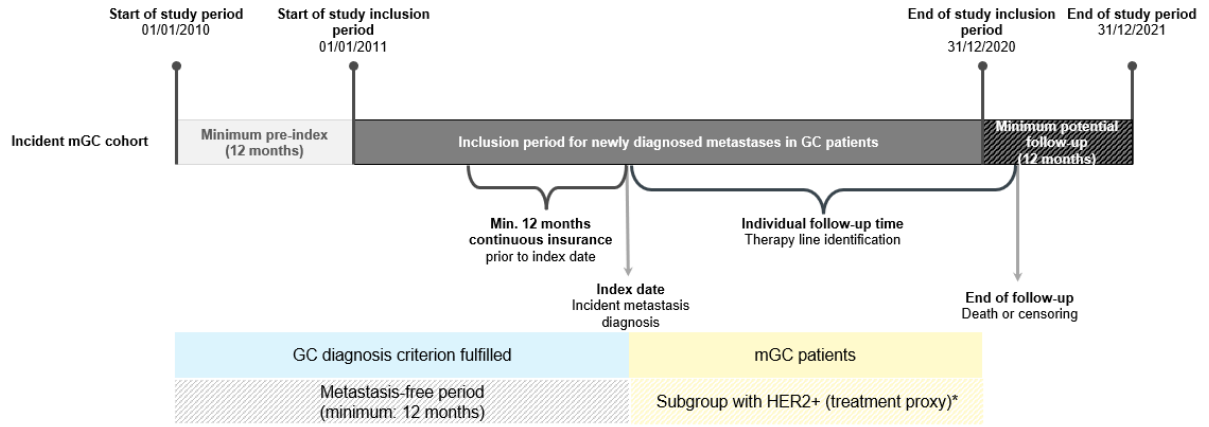

\*It needs to be noted that due to the treatment proxy applied to identify HER2+ patients this study does not cover untreated cases (HER2+ without trastuzumab treatment) and therefore the numbers are generally underestimating the HER2+ mGC incidence/prevalence.
