# Supplementary material for: Real-world evidence of treatment patterns and survival of metastatic gastric cancer patients in Germany
Source: Springer Nature journal article supplement (doi:10.1186/s12885-024-12204-x), 2024-04-13

a)

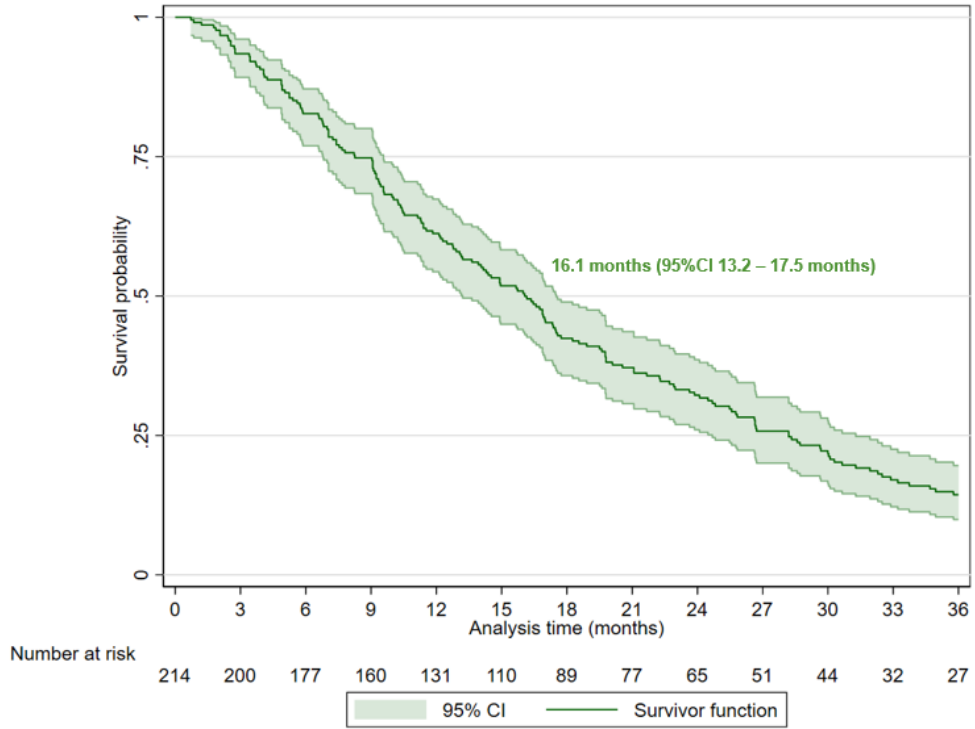

Supplement: MOESM2 [file 26976158]
